# Supplementary material for: Derivation and validation of a chief complaint shortlist for unscheduled acute and emergency care in Uganda
Source: PubMed Central journal article supplement — BMJ Open. 2018 Jun 27;8(6):e020188. doi: 10.1136/bmjopen-2017-020188 (PMC6020949; doi:10.1136/bmjopen-2017-020188), 2018-06-27
Supplement: bmjopen-2017-020188supp001.pdf [file bmjopen-2017-020188supp001.pdf]

## Appendix 1: Longlist of Chief Complaints for Derivation Dataset

| Num. | Longlist Chief Complaints | Freq. | Percent | Cum. % |
|------|---------------------------|-------|---------|--------|
| 1    | FEVER                     | 3,579 | 8.86    | 8.86   |
| 2    | HEADACHE                  | 3,485 | 8.63    | 17.49  |
| 3    | COUGH                     | 2,689 | 6.66    | 24.15  |
| 4    | ABDOMINAL PAIN            | 2,504 | 6.2     | 30.35  |
| 5    | VOMITING                  | 2,289 | 5.67    | 36.01  |
| 6    | DIARRHEA                  | 1,543 | 3.82    | 39.84  |
| 7    | DIFFICULTY IN BREATHING   | 1,319 | 3.27    | 43.1   |
| 8    | CHEST PAIN                | 1,210 | 3       | 46.1   |
| 9    | WEAKNESS - GENERAL        | 1,171 | 2.9     | 49     |
| 10   | ROAD TRAFFIC ACCIDENT     | 1,157 | 2.86    | 51.86  |
| 11   | CATHETER CHANGE           | 1,033 | 2.56    | 54.42  |
| 12   | DRESSING CHANGE           | 707   | 1.75    | 56.17  |
| 13   | DIZZINESS                 | 684   | 1.69    | 57.86  |
| 14   | UNRESPONSIVE              | 586   | 1.45    | 59.31  |
| 15   | ASSAULT                   | 540   | 1.34    | 60.65  |
| 16   | FLU                       | 505   | 1.25    | 61.9   |
| 17   | PAIN - EPIGASTRIC         | 434   | 1.07    | 62.98  |
| 18   | BACK ACHE                 | 394   | 0.98    | 63.95  |
| 19   | PAIN - LEG                | 393   | 0.97    | 64.92  |
| 20   | LOSS OF APPETITE          | 333   | 0.82    | 65.75  |
| 21   | PAIN - JOINT              | 328   | 0.81    | 66.56  |
| 22   | BURN                      | 273   | 0.68    | 67.24  |
| 23   | CONFUSION                 | 266   | 0.66    | 67.89  |
| 24   | SWELLING                  | 258   | 0.64    | 68.53  |
| 25   | PAIN - ARM                | 247   | 0.61    | 69.15  |
| 26   | ABDOMINAL DISTENSION      | 214   | 0.53    | 69.67  |
| 27   | POISONING                 | 210   | 0.52    | 70.19  |
| 28   | HEARING LOSS              | 205   | 0.51    | 70.7   |
| 29   | WOUND                     | 205   | 0.51    | 71.21  |
| 30   | FOREIGN BODY - EAR        | 202   | 0.5     | 71.71  |
| 31   | FALL                      | 191   | 0.47    | 72.18  |
| 32   | INGESTION - FB            | 189   | 0.47    | 72.65  |
| 33   | BITE - DOG                | 186   | 0.46    | 73.11  |
| 34   | SEIZURE                   | 180   | 0.45    | 73.56  |
| 35   | CHILLS                    | 160   | 0.4     | 73.95  |
| 36   | PAIN - NECK               | 159   | 0.39    | 74.35  |
| 37   | BLEEDING - VAGINA         | 156   | 0.39    | 74.73  |
| 38   | CUT                       | 154   | 0.38    | 75.11  |
| 39   | PAIN - EAR                | 154   | 0.38    | 75.5   |
| 40   | PAIN - BACK               | 142   | 0.35    | 75.85  |
| 41   | DYSURIA                   | 139   | 0.34    | 76.19  |
| 42   | FOREIGN BODY - NOSE       | 135   | 0.33    | 76.53  |
| 43   | SUTURE REMOVAL            | 131   | 0.32    | 76.85  |
| 44   | SWELLING - BODY           | 128   | 0.32    | 77.17  |
| 45   | UNABLE TO TALK            | 123   | 0.3     | 77.47  |
| 46   | ANOREXIA                  | 121   | 0.3     | 77.77  |
| 47   | PRURITUS                  | 115   | 0.28    | 78.06  |
| 48   | UNABLE TO PASS URINE      | 115   | 0.28    | 78.34  |
| 49   | NAUSEA                    | 113   | 0.28    | 78.62  |
| 50   | PAIN - SHOULDER           | 110   | 0.27    | 78.89  |
| 51   | DIARRHEA - BLOODY         | 108   | 0.27    | 79.16  |
| 52   | ALTERED MENTAL STATUS     | 106   | 0.26    | 79.42  |
| 53   | RASH                      | 105   | 0.26    | 79.68  |
| 54   | URINARY RETENTION         | 103   | 0.26    | 79.94  |
| 55   | FOREIGN BODY - THROAT     | 102   | 0.25    | 80.19  |
| 56   | SWELLING - LEG            | 98    | 0.24    | 80.43  |
| 57   | WOUND - HEAD              | 97    | 0.24    | 80.67  |
| 58   | WOUND - LEG               | 94    | 0.23    | 80.91  |
| 59   | TONGUE TIE                | 92    | 0.23    | 81.13  |

|     |                                         |    |      |       |
|-----|-----------------------------------------|----|------|-------|
| 60  | LACERATION                              | 87 | 0.22 | 81.35 |
| 61  | BLEEDING                                | 82 | 0.2  | 81.55 |
| 62  | PAIN - EYE                              | 82 | 0.2  | 81.75 |
| 63  | FEEDING PROBLEM                         | 81 | 0.2  | 81.96 |
| 64  | SHORTNESS OF BREATH                     | 80 | 0.2  | 82.15 |
| 65  | BLEEDING - NOSE                         | 79 | 0.2  | 82.35 |
| 66  | PAIN - KNEE                             | 79 | 0.2  | 82.54 |
| 67  | POISONING - COWTICK                     | 79 | 0.2  | 82.74 |
| 68  | SORE THROAT                             | 77 | 0.19 | 82.93 |
| 69  | EPISTAXIS                               | 76 | 0.19 | 83.12 |
| 70  | UNCONSCIOUS                             | 76 | 0.19 | 83.31 |
| 71  | PAIN - FOOT                             | 75 | 0.19 | 83.49 |
| 72  | WEIGHT LOSS                             | 74 | 0.18 | 83.68 |
| 73  | HEMATEMESIS                             | 71 | 0.18 | 83.85 |
| 74  | CONSTIPATION                            | 69 | 0.17 | 84.02 |
| 75  | PAIN - THIGH                            | 69 | 0.17 | 84.19 |
| 76  | BRUISING                                | 68 | 0.17 | 84.36 |
| 77  | WOUND - FACE                            | 68 | 0.17 | 84.53 |
| 78  | CATHETER PROBLEM                        | 66 | 0.16 | 84.69 |
| 79  | PAIN - LOWER EXTREMITY                  | 66 | 0.16 | 84.86 |
| 80  | SEMICONSCIOUS                           | 66 | 0.16 | 85.02 |
| 81  | DIARRHEA - NONBLOODY                    | 63 | 0.16 | 85.18 |
| 82  | NUMBNESS/TINGLING                       | 63 | 0.16 | 85.33 |
| 83  | PAIN - FINGER                           | 63 | 0.16 | 85.49 |
| 84  | PAIN - HEAD                             | 60 | 0.15 | 85.64 |
| 85  | INTOXICATION - ALCOHOL                  | 58 | 0.14 | 85.78 |
| 86  | PAIN - HIP                              | 58 | 0.14 | 85.92 |
| 87  | BREATHING PROBLEM                       | 57 | 0.14 | 86.07 |
| 88  | INJURY                                  | 57 | 0.14 | 86.21 |
| 89  | SHIVERING                               | 56 | 0.14 | 86.35 |
| 90  | ABSCESS                                 | 53 | 0.13 | 86.48 |
| 91  | ROAD TRAFFIC ACCIDENT - PEDESTRIAN      | 53 | 0.13 | 86.61 |
| 92  | ABRASION                                | 52 | 0.13 | 86.74 |
| 93  | DIAGNOSTIC/THERAPEUTIC PROCEDURE NEEDED | 52 | 0.13 | 86.87 |
| 94  | PAINFUL SWELLING - LEG                  | 52 | 0.13 | 86.99 |
| 95  | CAST PROBLEM                            | 51 | 0.13 | 87.12 |
| 96  | SWELLING - BREAST                       | 50 | 0.12 | 87.24 |
| 97  | WOUND - FOOT                            | 50 | 0.12 | 87.37 |
| 98  | INGUINAL PAIN                           | 49 | 0.12 | 87.49 |
| 99  | POISONING - SUSPECTED                   | 49 | 0.12 | 87.61 |
| 100 | FAILURE TO PASS STOOL                   | 48 | 0.12 | 87.73 |
| 101 | LACERATION - HEAD                       | 46 | 0.11 | 87.84 |
| 102 | PAIN - HAND                             | 46 | 0.11 | 87.96 |
| 103 | WOUND CHECK                             | 46 | 0.11 | 88.07 |
| 104 | BLEEDING - HEAD                         | 44 | 0.11 | 88.18 |
| 105 | WASTING                                 | 43 | 0.11 | 88.29 |
| 106 | WOUND - FINGER                          | 43 | 0.11 | 88.39 |
| 107 | ABNORMAL BLOOD SUGAR                    | 42 | 0.1  | 88.5  |
| 108 | SWELLING - ARM                          | 42 | 0.1  | 88.6  |
| 109 | FOREIGN BODY                            | 41 | 0.1  | 88.7  |
| 110 | EDEMA - GENERALIZED                     | 40 | 0.1  | 88.8  |
| 111 | FAINTING                                | 40 | 0.1  | 88.9  |
| 112 | HEMOPTYSIS                              | 40 | 0.1  | 89    |
| 113 | URINARY PROBLEM                         | 40 | 0.1  | 89.1  |
| 114 | LOSS OF CONSCIOUSNESS                   | 38 | 0.09 | 89.19 |
| 115 | PAIN - BODY                             | 38 | 0.09 | 89.29 |
| 116 | PUNCTURE WOUND                          | 38 | 0.09 | 89.38 |
| 117 | CHEST TIGHTNESS                         | 37 | 0.09 | 89.47 |
| 118 | SORES - ORAL                            | 37 | 0.09 | 89.56 |
| 119 | HIT                                     | 36 | 0.09 | 89.65 |
| 120 | PAIN - RECT                             | 36 | 0.09 | 89.74 |
| 121 | SWELLING - EYE                          | 36 | 0.09 | 89.83 |
| 122 | SWELLING - SCROTAL                      | 36 | 0.09 | 89.92 |

|     |                             |    |      |       |
|-----|-----------------------------|----|------|-------|
| 123 | WOUND DRESSING              | 36 | 0.09 | 90.01 |
| 124 | ABDOMINAL FULLNESS          | 35 | 0.09 | 90.1  |
| 125 | NIGHT SWEATS                | 35 | 0.09 | 90.18 |
| 126 | WOUND - KNEE                | 35 | 0.09 | 90.27 |
| 127 | CUT - FINGER                | 34 | 0.08 | 90.35 |
| 128 | HEMATURIA                   | 34 | 0.08 | 90.44 |
| 129 | PAIN - PELVIC               | 34 | 0.08 | 90.52 |
| 130 | WOUND - FACIAL              | 34 | 0.08 | 90.61 |
| 131 | ABDOMINAL PAIN - EPIGASTRIC | 33 | 0.08 | 90.69 |
| 132 | BODY ACHES                  | 33 | 0.08 | 90.77 |
| 133 | LACERATION - FACIAL         | 33 | 0.08 | 90.85 |
| 134 | LACERATION - SCALP          | 33 | 0.08 | 90.93 |
| 135 | SWELLING - TESTES           | 33 | 0.08 | 91.01 |
| 136 | EAR WAX                     | 32 | 0.08 | 91.09 |
| 137 | PAIN - LIMB                 | 32 | 0.08 | 91.17 |
| 138 | FRACTURE                    | 31 | 0.08 | 91.25 |
| 139 | HICCUPS                     | 31 | 0.08 | 91.33 |
| 140 | PAIN - FACE                 | 31 | 0.08 | 91.4  |
| 141 | BLEEDING - SCALP            | 30 | 0.07 | 91.48 |
| 142 | HEAD INJURY                 | 29 | 0.07 | 91.55 |
| 143 | PAIN - TOE                  | 29 | 0.07 | 91.62 |
| 144 | STOMACH ACHE                | 29 | 0.07 | 91.69 |
| 145 | SWELLING - CHEEK            | 28 | 0.07 | 91.76 |
| 146 | SWELLING - FOOT             | 28 | 0.07 | 91.83 |
| 147 | SWELLING - HEAD             | 28 | 0.07 | 91.9  |
| 148 | BEE STING                   | 27 | 0.07 | 91.97 |
| 149 | PAIN - BREAST               | 27 | 0.07 | 92.03 |
| 150 | VAGINA DISCHARGE            | 27 | 0.07 | 92.1  |
| 151 | ABDOMINAL DISCOMFORT        | 26 | 0.06 | 92.17 |
| 152 | BITE                        | 26 | 0.06 | 92.23 |
| 153 | BLEEDING - MOUTH            | 26 | 0.06 | 92.29 |
| 154 | DENTAL PROBLEM              | 26 | 0.06 | 92.36 |
| 155 | EDEMA - LOWER EXT           | 26 | 0.06 | 92.42 |
| 156 | FRACTURE - LEG              | 26 | 0.06 | 92.49 |
| 157 | SWELLING - FACE             | 26 | 0.06 | 92.55 |
| 158 | WOUND - HAND                | 26 | 0.06 | 92.62 |
| 159 | BLEEDING - LEG              | 25 | 0.06 | 92.68 |
| 160 | NECK STIFFNESS              | 25 | 0.06 | 92.74 |
| 161 | PAIN - TESTES               | 25 | 0.06 | 92.8  |
| 162 | SWELLING - PENILE           | 25 | 0.06 | 92.86 |
| 163 | UNABLE TO WALK              | 25 | 0.06 | 92.93 |
| 164 | WOUND - SCALP               | 25 | 0.06 | 92.99 |
| 165 | BLEEDING - EAR              | 24 | 0.06 | 93.05 |
| 166 | RAPE                        | 24 | 0.06 | 93.11 |
| 167 | SORES                       | 24 | 0.06 | 93.17 |
| 168 | SWELLING - BUTT             | 24 | 0.06 | 93.23 |
| 169 | MALAISE                     | 23 | 0.06 | 93.28 |
| 170 | PAIN - ELBOW                | 23 | 0.06 | 93.34 |
| 171 | BLEEDING - FACE             | 22 | 0.05 | 93.39 |
| 172 | DIFFICULTY SWALLOWING       | 22 | 0.05 | 93.45 |
| 173 | DROWSINESS                  | 22 | 0.05 | 93.5  |
| 174 | PAIN - THUMB                | 22 | 0.05 | 93.56 |
| 175 | PAIN - WRIST                | 22 | 0.05 | 93.61 |
| 176 | RUNNY NOSE                  | 22 | 0.05 | 93.67 |
| 177 | ULCER                       | 22 | 0.05 | 93.72 |
| 178 | BITE - SNAKE                | 21 | 0.05 | 93.77 |
| 179 | FAILURE TO THRIVE           | 21 | 0.05 | 93.83 |
| 180 | FAST BREATHING              | 21 | 0.05 | 93.88 |
| 181 | LIGHTENING STRIKE           | 21 | 0.05 | 93.93 |
| 182 | POISONING - PARAFFIN        | 21 | 0.05 | 93.98 |
| 183 | SWELLING - EAR              | 21 | 0.05 | 94.03 |
| 184 | SWELLING - NECK             | 21 | 0.05 | 94.09 |
| 185 | FORESKIN RETRACTION         | 20 | 0.05 | 94.13 |

|     |                            |    |      |       |
|-----|----------------------------|----|------|-------|
| 186 | INCONTINENCE - URINARY     | 20 | 0.05 | 94.18 |
| 187 | JOINT ACHES                | 20 | 0.05 | 94.23 |
| 188 | LACERATION - FACE          | 20 | 0.05 | 94.28 |
| 189 | NASAL CONGESTION           | 20 | 0.05 | 94.33 |
| 190 | PARALYSIS                  | 20 | 0.05 | 94.38 |
| 191 | SWELLING - FINGER          | 20 | 0.05 | 94.43 |
| 192 | SWELLING - LOWER EXTREMITY | 20 | 0.05 | 94.48 |
| 193 | PALPITATIONS               | 19 | 0.05 | 94.53 |
| 194 | POISONING - RAT            | 19 | 0.05 | 94.58 |
| 195 | THRUSH - ORAL              | 19 | 0.05 | 94.62 |
| 196 | TOOTHACHE                  | 19 | 0.05 | 94.67 |
| 197 | WOUND - ARM                | 19 | 0.05 | 94.72 |
| 198 | WOUND - EYE                | 19 | 0.05 | 94.76 |
| 199 | ABDOMINAL SWELLING         | 18 | 0.04 | 94.81 |
| 200 | ANIMAL ATTACK - COW        | 18 | 0.04 | 94.85 |
| 201 | ASTHMA                     | 18 | 0.04 | 94.9  |
| 202 | FAILURE TO EAT             | 18 | 0.04 | 94.94 |
| 203 | FAILURE TO GROW            | 18 | 0.04 | 94.99 |
| 204 | LACERATION - LEG           | 18 | 0.04 | 95.03 |
| 205 | PAINFUL SWELLING - ARM     | 18 | 0.04 | 95.08 |
| 206 | RESTLESSNESS               | 18 | 0.04 | 95.12 |
| 207 | SWELLING - GENITAL         | 18 | 0.04 | 95.16 |
| 208 | SWELLING - THIGH           | 18 | 0.04 | 95.21 |
| 209 | WOUND - FOREHEAD           | 18 | 0.04 | 95.25 |
| 210 | WOUND - HEEL               | 18 | 0.04 | 95.3  |
| 211 | ABDOMINAL CRAMPS           | 17 | 0.04 | 95.34 |
| 212 | DIAPHORESIS                | 17 | 0.04 | 95.38 |
| 213 | MALARIA                    | 17 | 0.04 | 95.42 |
| 214 | PAIN - ANKLE               | 17 | 0.04 | 95.47 |
| 215 | SWELLING - FEET            | 17 | 0.04 | 95.51 |
| 216 | VISION CHANGE              | 17 | 0.04 | 95.55 |
| 217 | WOUND - TOE                | 17 | 0.04 | 95.59 |
| 218 | ABNORMAL CRYING            | 16 | 0.04 | 95.63 |
| 219 | BITE - CAT                 | 16 | 0.04 | 95.67 |
| 220 | LACERATION - KNEE          | 16 | 0.04 | 95.71 |
| 221 | MYALGIA                    | 16 | 0.04 | 95.75 |
| 222 | PAIN - RIB                 | 16 | 0.04 | 95.79 |
| 223 | RABIES VACCINE             | 16 | 0.04 | 95.83 |
| 224 | WOUND - LIP                | 16 | 0.04 | 95.87 |
| 225 | WOUND - THUMB              | 16 | 0.04 | 95.91 |
| 226 | IV PLACEMENT               | 15 | 0.04 | 95.95 |
| 227 | JAW DISLOCATION            | 15 | 0.04 | 95.98 |
| 228 | LACERATION - LIP           | 15 | 0.04 | 96.02 |
| 229 | PAIN - STOMACH             | 15 | 0.04 | 96.06 |
| 230 | PAINFUL SWELLING - FINGER  | 15 | 0.04 | 96.1  |
| 231 | PAINFUL SWELLING - FOOT    | 15 | 0.04 | 96.13 |
| 232 | EAR SYRINGING              | 14 | 0.03 | 96.17 |
| 233 | FOREIGN BODY - EYE         | 14 | 0.03 | 96.2  |
| 234 | OVERDOSE                   | 14 | 0.03 | 96.24 |
| 235 | PAIN - UPPER EXTREMITY     | 14 | 0.03 | 96.27 |
| 236 | PAINFUL SWELLING - BREAST  | 14 | 0.03 | 96.31 |
| 237 | PAINFUL SWELLING - EYE     | 14 | 0.03 | 96.34 |
| 238 | TRAUMA                     | 14 | 0.03 | 96.38 |
| 239 | WOUND - THIGH              | 14 | 0.03 | 96.41 |
| 240 | BLEEDING - FINGER          | 13 | 0.03 | 96.44 |
| 241 | BLEEDING - KNEE            | 13 | 0.03 | 96.47 |
| 242 | DIFFICULT URINATION        | 13 | 0.03 | 96.51 |
| 243 | PAIN - CHEEK               | 13 | 0.03 | 96.54 |
| 244 | PAIN - JAW                 | 13 | 0.03 | 96.57 |
| 245 | PAINFUL SWELLING - KNEE    | 13 | 0.03 | 96.6  |
| 246 | PAINFUL SWELLING - THIGH   | 13 | 0.03 | 96.64 |
| 247 | PARALYSIS - RIGHT SIDED    | 13 | 0.03 | 96.67 |
| 248 | POISONING - PESTICIDE      | 13 | 0.03 | 96.7  |

|     |                               |    |      |       |
|-----|-------------------------------|----|------|-------|
| 249 | ROAD TRAFFIC ACCIDENT - TRUCK | 13 | 0.03 | 96.73 |
| 250 | SWELLING - FACIAL             | 13 | 0.03 | 96.76 |
| 251 | VAGINA COMPLAINT              | 13 | 0.03 | 96.8  |
| 252 | BLEEDING - PELVIC             | 12 | 0.03 | 96.83 |
| 253 | BLEEDING - PENILE             | 12 | 0.03 | 96.86 |
| 254 | FATIGUE                       | 12 | 0.03 | 96.89 |
| 255 | FRACTURE - ARM                | 12 | 0.03 | 96.92 |
| 256 | PAIN - INCISION               | 12 | 0.03 | 96.94 |
| 257 | PAIN - LIP                    | 12 | 0.03 | 96.97 |
| 258 | PHIMOSIS                      | 12 | 0.03 | 97    |
| 259 | TRAUMA - HEAD                 | 12 | 0.03 | 97.03 |
| 260 | URINARY FREQUENCY             | 12 | 0.03 | 97.06 |
| 261 | EAR ACHE                      | 11 | 0.03 | 97.09 |
| 262 | INGROWN NAIL                  | 11 | 0.03 | 97.12 |
| 263 | MALNUTRITION                  | 11 | 0.03 | 97.15 |
| 264 | PAIN - BUTT                   | 11 | 0.03 | 97.17 |
| 265 | PAIN - SCROTAL                | 11 | 0.03 | 97.2  |
| 266 | PENILE DISCHARGE              | 11 | 0.03 | 97.23 |
| 267 | SWELLING - HAND               | 11 | 0.03 | 97.25 |
| 268 | SWELLING - UMBILICAL          | 11 | 0.03 | 97.28 |
| 269 | ABSCESS - BREAST              | 10 | 0.02 | 97.31 |
| 270 | CUT - ARM                     | 10 | 0.02 | 97.33 |
| 271 | EYE DISCHARGE                 | 10 | 0.02 | 97.36 |
| 272 | INGESTION - DRUG              | 10 | 0.02 | 97.38 |
| 273 | PAINFUL SWELLING - HAND       | 10 | 0.02 | 97.41 |
| 274 | PARALYSIS - LEFT SIDED        | 10 | 0.02 | 97.43 |
| 275 | WOUND - LOWER EXTREMITY       | 10 | 0.02 | 97.45 |
| 276 | BLEEDING - FOOT               | 9  | 0.02 | 97.48 |
| 277 | DYSPHASIA                     | 9  | 0.02 | 97.5  |
| 278 | LACERATION - EYE              | 9  | 0.02 | 97.52 |
| 279 | LACERATION - HAND             | 9  | 0.02 | 97.54 |
| 280 | PAIN - FEET                   | 9  | 0.02 | 97.57 |
| 281 | PAIN - PENILE                 | 9  | 0.02 | 97.59 |
| 282 | PAIN - TOOTH                  | 9  | 0.02 | 97.61 |
| 283 | PAINFUL SWELLING - BUTT       | 9  | 0.02 | 97.63 |
| 284 | PAINFUL SWELLING - CHEEK      | 9  | 0.02 | 97.66 |
| 285 | PAINFUL SWELLING - PENILE     | 9  | 0.02 | 97.68 |
| 286 | PARAPHIMOSIS                  | 9  | 0.02 | 97.7  |
| 287 | RIGORS                        | 9  | 0.02 | 97.72 |
| 288 | SWELLING - LIP                | 9  | 0.02 | 97.74 |
| 289 | UNABLE TO STAND               | 9  | 0.02 | 97.77 |
| 290 | WOUND - MOUTH                 | 9  | 0.02 | 97.79 |
| 291 | YELLOW EYES                   | 9  | 0.02 | 97.81 |
| 292 | ABDOMINAL PAIN - COLICKY      | 8  | 0.02 | 97.83 |
| 293 | BLEEDING - ARM                | 8  | 0.02 | 97.85 |
| 294 | BLEEDING - TOE                | 8  | 0.02 | 97.87 |
| 295 | DISCHARGE - EAR               | 8  | 0.02 | 97.89 |
| 296 | DYSYPNEA                      | 8  | 0.02 | 97.91 |
| 297 | EYE REDNESS                   | 8  | 0.02 | 97.93 |
| 298 | IMPERFORATE VAGINA            | 8  | 0.02 | 97.95 |
| 299 | LACERATION - FOREHEAD         | 8  | 0.02 | 97.97 |
| 300 | NG TUBE PROBLEM               | 8  | 0.02 | 97.99 |
| 301 | PAIN - MOUTH                  | 8  | 0.02 | 98.01 |
| 302 | PAIN - PELVIS                 | 8  | 0.02 | 98.03 |
| 303 | PAINFUL SWELLING - NECK       | 8  | 0.02 | 98.05 |
| 304 | RECTAL PROLAPSE               | 8  | 0.02 | 98.07 |
| 305 | STUNTED GROWTH                | 8  | 0.02 | 98.09 |
| 306 | SWELLING - FOREHEAD           | 8  | 0.02 | 98.11 |
| 307 | SWELLING - KNEE               | 8  | 0.02 | 98.13 |
| 308 | WHEEZING                      | 8  | 0.02 | 98.15 |
| 309 | WOUND - BACK                  | 8  | 0.02 | 98.17 |
| 310 | WOUND CLEANING                | 8  | 0.02 | 98.19 |
| 311 | ABDOMINAL PAIN - GENERAL      | 7  | 0.02 | 98.2  |

|     |                              |   |      |       |
|-----|------------------------------|---|------|-------|
| 312 | ABNORMAL BLOOD PRESSURE      | 7 | 0.02 | 98.22 |
| 313 | AGITATION                    | 7 | 0.02 | 98.24 |
| 314 | BLEEDING - FOREHEAD          | 7 | 0.02 | 98.26 |
| 315 | BLEEDING - HAND              | 7 | 0.02 | 98.27 |
| 316 | BLUNT TRAUMA                 | 7 | 0.02 | 98.29 |
| 317 | CHANGE IN SENSATION          | 7 | 0.02 | 98.31 |
| 318 | CUT - HAND                   | 7 | 0.02 | 98.33 |
| 319 | LACERATION - FOOT            | 7 | 0.02 | 98.34 |
| 320 | MEDICATION REFILL            | 7 | 0.02 | 98.36 |
| 321 | PAINFUL SWELLING - HEAD      | 7 | 0.02 | 98.38 |
| 322 | PAINFUL SWELLING - SCROTAL   | 7 | 0.02 | 98.4  |
| 323 | PAINFUL SWELLING - TESTES    | 7 | 0.02 | 98.41 |
| 324 | STAB WOUND                   | 7 | 0.02 | 98.43 |
| 325 | SWELLING - BACK              | 7 | 0.02 | 98.45 |
| 326 | TREMOR                       | 7 | 0.02 | 98.46 |
| 327 | WOUND - ANKLE                | 7 | 0.02 | 98.48 |
| 328 | WOUND - CHEEK                | 7 | 0.02 | 98.5  |
| 329 | WOUND - CHIN                 | 7 | 0.02 | 98.52 |
| 330 | WOUND - NECK                 | 7 | 0.02 | 98.53 |
| 331 | ABDOMINAL PAIN - LEFT        | 6 | 0.01 | 98.55 |
| 332 | ABDOMINAL PAIN - RIGHT LOWER | 6 | 0.01 | 98.56 |
| 333 | ABSCCESS - BUTT              | 6 | 0.01 | 98.58 |
| 334 | BLEEDING - TONGUE            | 6 | 0.01 | 98.59 |
| 335 | CUT - HEAD                   | 6 | 0.01 | 98.61 |
| 336 | CUT - THUMB                  | 6 | 0.01 | 98.62 |
| 337 | DEAD ON ARRIVAL              | 6 | 0.01 | 98.64 |
| 338 | DROWNING                     | 6 | 0.01 | 98.65 |
| 339 | LACERATION - ARM             | 6 | 0.01 | 98.67 |
| 340 | LACERATION - EAR             | 6 | 0.01 | 98.68 |
| 341 | PAIN - ANAL                  | 6 | 0.01 | 98.7  |
| 342 | PAIN - AXILLA                | 6 | 0.01 | 98.71 |
| 343 | PAIN - CHIN                  | 6 | 0.01 | 98.73 |
| 344 | PAIN - UMBILICAL             | 6 | 0.01 | 98.74 |
| 345 | PAINFUL SWELLING - THUMB     | 6 | 0.01 | 98.76 |
| 346 | SWELLING - EYELID            | 6 | 0.01 | 98.77 |
| 347 | SWELLING - SHOULDER          | 6 | 0.01 | 98.79 |
| 348 | TALKATIVE                    | 6 | 0.01 | 98.8  |
| 349 | WEAKNESS - LEFT SIDED        | 6 | 0.01 | 98.82 |
| 350 | WOUND - BUTT                 | 6 | 0.01 | 98.83 |
| 351 | WOUND - PALM                 | 6 | 0.01 | 98.85 |
| 352 | WOUND - TONGUE               | 6 | 0.01 | 98.86 |
| 353 | ABDOMINAL PAIN - LEFT LOWER  | 5 | 0.01 | 98.87 |
| 354 | BLEEDING - EYE               | 5 | 0.01 | 98.89 |
| 355 | CUT - FOOT                   | 5 | 0.01 | 98.9  |
| 356 | CUT - LEG                    | 5 | 0.01 | 98.91 |
| 357 | DECREASED RESPONSIVENESS     | 5 | 0.01 | 98.92 |
| 358 | FORESKIN SWELLING            | 5 | 0.01 | 98.94 |
| 359 | PAIN - NOSE                  | 5 | 0.01 | 98.95 |
| 360 | PAIN - PALM                  | 5 | 0.01 | 98.96 |
| 361 | PAIN - TONGUE                | 5 | 0.01 | 98.97 |
| 362 | PAINFUL SWELLING - ANKLE     | 5 | 0.01 | 98.98 |
| 363 | PAINFUL SWELLING - EAR       | 5 | 0.01 | 99    |
| 364 | SEMIRESPONSIVE               | 5 | 0.01 | 99.01 |
| 365 | SWELLING - ANAL              | 5 | 0.01 | 99.02 |
| 366 | SWELLING - AXILLA            | 5 | 0.01 | 99.03 |
| 367 | SWELLING - LIMB              | 5 | 0.01 | 99.05 |
| 368 | TROUBLE IN BREATHING         | 5 | 0.01 | 99.06 |
| 369 | WOUND - NOSE                 | 5 | 0.01 | 99.07 |
| 370 | ABSCCESS - THIGH             | 4 | 0.01 | 99.08 |
| 371 | ANXIETY                      | 4 | 0.01 | 99.09 |
| 372 | BLEEDING - FACIAL            | 4 | 0.01 | 99.1  |
| 373 | BLEEDING - LIP               | 4 | 0.01 | 99.11 |

|     |                             |   |      |       |
|-----|-----------------------------|---|------|-------|
| 374 | BLEEDING - RECT             | 4 | 0.01 | 99.12 |
| 375 | CUT - TOE                   | 4 | 0.01 | 99.13 |
| 376 | INCONTINENCE                | 4 | 0.01 | 99.14 |
| 377 | LACERATION - CHIN           | 4 | 0.01 | 99.15 |
| 378 | LACERATION - ELBOW          | 4 | 0.01 | 99.16 |
| 379 | LACERATION - FINGER         | 4 | 0.01 | 99.17 |
| 380 | LACERATION - NOSE           | 4 | 0.01 | 99.18 |
| 381 | PAIN - SCALP                | 4 | 0.01 | 99.19 |
| 382 | PAIN - SUPRAPUBIC           | 4 | 0.01 | 99.2  |
| 383 | PAIN - URETHRA              | 4 | 0.01 | 99.21 |
| 384 | PAINFUL SWELLING - GENITAL  | 4 | 0.01 | 99.22 |
| 385 | PAINFUL SWELLING - SHOULDER | 4 | 0.01 | 99.23 |
| 386 | PAINFUL SWELLING - TOE      | 4 | 0.01 | 99.24 |
| 387 | PALLOR                      | 4 | 0.01 | 99.25 |
| 388 | SUICIDE ATTEMPT             | 4 | 0.01 | 99.26 |
| 389 | SWELLING - ANKLE            | 4 | 0.01 | 99.27 |
| 390 | SWELLING - JAW              | 4 | 0.01 | 99.28 |
| 391 | SWELLING - SCALP            | 4 | 0.01 | 99.29 |
| 392 | SWELLING - TOE              | 4 | 0.01 | 99.3  |
| 393 | SWELLING - TONGUE           | 4 | 0.01 | 99.31 |
| 394 | WEAKNESS - RIGHT SIDED      | 4 | 0.01 | 99.32 |
| 395 | WOUND - EAR                 | 4 | 0.01 | 99.33 |
| 396 | WOUND - ELBOW               | 4 | 0.01 | 99.34 |
| 397 | WOUND - WRIST               | 4 | 0.01 | 99.35 |
| 398 | ABDOMINAL PAIN - LEFT UPPER | 3 | 0.01 | 99.36 |
| 399 | ABSCESS - AXILLA            | 3 | 0.01 | 99.36 |
| 400 | ABSCESS - LEG               | 3 | 0.01 | 99.37 |
| 401 | ABSCESS - NECK              | 3 | 0.01 | 99.38 |
| 402 | ALLERGIC REACTION           | 3 | 0.01 | 99.39 |
| 403 | BLEEDING - GENITAL          | 3 | 0.01 | 99.39 |
| 404 | BLEEDING - THUMB            | 3 | 0.01 | 99.4  |
| 405 | CUT - FACE                  | 3 | 0.01 | 99.41 |
| 406 | CUT - NECK                  | 3 | 0.01 | 99.42 |
| 407 | CUT - SCALP                 | 3 | 0.01 | 99.42 |
| 408 | DIFFICULT MICTURITION       | 3 | 0.01 | 99.43 |
| 409 | EDEMA - FACIAL              | 3 | 0.01 | 99.44 |
| 410 | FOREIGN BODY - COIN         | 3 | 0.01 | 99.45 |
| 411 | LACERATION - THIGH          | 3 | 0.01 | 99.45 |
| 412 | PAIN - FACIAL               | 3 | 0.01 | 99.46 |
| 413 | PAIN - HEEL                 | 3 | 0.01 | 99.47 |
| 414 | PAINFUL SWELLING - AXILLA   | 3 | 0.01 | 99.48 |
| 415 | PARACENTESIS                | 3 | 0.01 | 99.48 |
| 416 | PREGNANCY RELATED COMPLAINT | 3 | 0.01 | 99.49 |
| 417 | SWELLING - CHIN             | 3 | 0.01 | 99.5  |
| 418 | SWELLING - HIP              | 3 | 0.01 | 99.5  |
| 419 | SWELLING - NOSE             | 3 | 0.01 | 99.51 |
| 420 | SWELLING - THUMB            | 3 | 0.01 | 99.52 |
| 421 | SWELLING - VAGINA           | 3 | 0.01 | 99.53 |
| 422 | TRAUMA - EYE                | 3 | 0.01 | 99.53 |
| 423 | WOUND - CALF                | 3 | 0.01 | 99.54 |
| 424 | WOUND - FEET                | 3 | 0.01 | 99.55 |
| 425 | WOUND - JAW                 | 3 | 0.01 | 99.56 |
| 426 | WOUND - LIMB                | 3 | 0.01 | 99.56 |
| 427 | WOUND - PENILE              | 3 | 0.01 | 99.57 |
| 428 | ABDOMINAL PAIN - RIGHT      | 2 | 0    | 99.58 |
| 429 | ABDOMINAL PAIN - UMBILICAL  | 2 | 0    | 99.58 |
| 430 | ABSCESS - ARM               | 2 | 0    | 99.59 |
| 431 | ABSCESS - INCISION          | 2 | 0    | 99.59 |
| 432 | BLEEDING - EYELID           | 2 | 0    | 99.6  |
| 433 | BLEEDING - PALM             | 2 | 0    | 99.6  |
| 434 | BLEEDING - SHOULDER         | 2 | 0    | 99.61 |
| 435 | BLEEDING - TOOTH            | 2 | 0    | 99.61 |
| 436 | BLEEDING - URETHRA          | 2 | 0    | 99.62 |

|     |                              |   |   |       |
|-----|------------------------------|---|---|-------|
| 437 | BLEEDING - WRIST             | 2 | 0 | 99.62 |
| 438 | BREATHLESSNESS               | 2 | 0 | 99.63 |
| 439 | CUT - EAR                    | 2 | 0 | 99.63 |
| 440 | CUT - FOREHEAD               | 2 | 0 | 99.64 |
| 441 | CUT - KNEE                   | 2 | 0 | 99.64 |
| 442 | CUT - MOUTH                  | 2 | 0 | 99.65 |
| 443 | CUT - PALM                   | 2 | 0 | 99.65 |
| 444 | CUT - WRIST                  | 2 | 0 | 99.66 |
| 445 | FRACTURE - FINGER            | 2 | 0 | 99.66 |
| 446 | FRACTURE - THIGH             | 2 | 0 | 99.67 |
| 447 | FRACTURE - TOOTH             | 2 | 0 | 99.67 |
| 448 | JAUNDICE                     | 2 | 0 | 99.68 |
| 449 | LACERATION - ANKLE           | 2 | 0 | 99.68 |
| 450 | LACERATION - HEEL            | 2 | 0 | 99.69 |
| 451 | LACERATION - LOWER EXTREMITY | 2 | 0 | 99.69 |
| 452 | LACERATION - NECK            | 2 | 0 | 99.7  |
| 453 | LACERATION - OCCIPUT         | 2 | 0 | 99.7  |
| 454 | LACERATION - PENILE          | 2 | 0 | 99.71 |
| 455 | LACERATION - TONGUE          | 2 | 0 | 99.71 |
| 456 | PAIN - FOREHEAD              | 2 | 0 | 99.72 |
| 457 | PAIN - GENITAL               | 2 | 0 | 99.72 |
| 458 | PAIN - VAGINA                | 2 | 0 | 99.73 |
| 459 | PAINFUL SWELLING - FACIAL    | 2 | 0 | 99.73 |
| 460 | PAINFUL SWELLING - HEEL      | 2 | 0 | 99.74 |
| 461 | PAINFUL SWELLING - LIP       | 2 | 0 | 99.74 |
| 462 | PAINFUL SWELLING - OCCIPUT   | 2 | 0 | 99.74 |
| 463 | SWELLING - PALM              | 2 | 0 | 99.75 |
| 464 | SWELLING - UPPER EXTREMITY   | 2 | 0 | 99.75 |
| 465 | SWELLING - WRIST             | 2 | 0 | 99.76 |
| 466 | TRAUMA - TOE                 | 2 | 0 | 99.76 |
| 467 | WEAKNESS - UNILATERAL        | 2 | 0 | 99.77 |
| 468 | WOUND - AXILLA               | 2 | 0 | 99.77 |
| 469 | WOUND - BREAST               | 2 | 0 | 99.78 |
| 470 | WOUND - SCROTAL              | 2 | 0 | 99.78 |
| 471 | WOUND - UPPER EXTREMITY      | 2 | 0 | 99.79 |
| 472 | WOUND - VAGINA               | 2 | 0 | 99.79 |
| 473 | ABDOMINAL PAIN - RIGHT UPPER | 1 | 0 | 99.8  |
| 474 | ABSCESS - FOOT               | 1 | 0 | 99.8  |
| 475 | ABSCESS - PERIANAL           | 1 | 0 | 99.8  |
| 476 | ABSCESS - PERINEAL           | 1 | 0 | 99.8  |
| 477 | ABSCESS - RECT               | 1 | 0 | 99.81 |
| 478 | ABSCESS - UMBILICAL          | 1 | 0 | 99.81 |
| 479 | BITE - HUMAN                 | 1 | 0 | 99.81 |
| 480 | BLEEDING - CHEEK             | 1 | 0 | 99.81 |
| 481 | BLEEDING - CHIN              | 1 | 0 | 99.82 |
| 482 | BLEEDING - INCISION          | 1 | 0 | 99.82 |
| 483 | BLEEDING - LOWER EXTREMITY   | 1 | 0 | 99.82 |
| 484 | BLEEDING - NECK              | 1 | 0 | 99.82 |
| 485 | BLEEDING - SHIN              | 1 | 0 | 99.83 |
| 486 | BLEEDING - THIGH             | 1 | 0 | 99.83 |
| 487 | CUT - ANKLE                  | 1 | 0 | 99.83 |
| 488 | CUT - BACK                   | 1 | 0 | 99.83 |
| 489 | CUT - EYE                    | 1 | 0 | 99.84 |
| 490 | CUT - HEEL                   | 1 | 0 | 99.84 |
| 491 | CUT - LIP                    | 1 | 0 | 99.84 |
| 492 | CUT - PENILE                 | 1 | 0 | 99.84 |
| 493 | CUT - TONGUE                 | 1 | 0 | 99.85 |
| 494 | FRACTURE - EAR               | 1 | 0 | 99.85 |
| 495 | FRACTURE - ELBOW             | 1 | 0 | 99.85 |
| 496 | FRACTURE - HIP               | 1 | 0 | 99.85 |
| 497 | FRACTURE - JAW               | 1 | 0 | 99.86 |
| 498 | FRACTURE - JOINT             | 1 | 0 | 99.86 |
| 499 | FRACTURE - KNEE              | 1 | 0 | 99.86 |



|     |                               |        |     |       |
|-----|-------------------------------|--------|-----|-------|
| 500 | FRACTURE - PELVIC             | 1      | 0   | 99.86 |
| 501 | FRACTURE - TOE                | 1      | 0   | 99.87 |
| 502 | FRACTURE - UPPER EXTREMITY    | 1      | 0   | 99.87 |
| 503 | FRACTURE - WRIST              | 1      | 0   | 99.87 |
| 504 | GUNSHOT WOUND                 | 1      | 0   | 99.87 |
| 505 | LACERATION - BACK             | 1      | 0   | 99.88 |
| 506 | LACERATION - BUTT             | 1      | 0   | 99.88 |
| 507 | LACERATION - EYELID           | 1      | 0   | 99.88 |
| 508 | LACERATION - LIMB             | 1      | 0   | 99.88 |
| 509 | LACERATION - MOUTH            | 1      | 0   | 99.89 |
| 510 | LACERATION - PALM             | 1      | 0   | 99.89 |
| 511 | LACERATION - RIB              | 1      | 0   | 99.89 |
| 512 | LACERATION - SCROTAL          | 1      | 0   | 99.89 |
| 513 | LACERATION - SHIN             | 1      | 0   | 99.9  |
| 514 | LACERATION - THUMB            | 1      | 0   | 99.9  |
| 515 | LACERATION - VAGINA           | 1      | 0   | 99.9  |
| 516 | LACERATION - WRIST            | 1      | 0   | 99.9  |
| 517 | PAIN - CALF                   | 1      | 0   | 99.91 |
| 518 | PAIN - EYELID                 | 1      | 0   | 99.91 |
| 519 | PAINFUL SWELLING - ANAL       | 1      | 0   | 99.91 |
| 520 | PAINFUL SWELLING - BACK       | 1      | 0   | 99.91 |
| 521 | PAINFUL SWELLING - CHIN       | 1      | 0   | 99.92 |
| 522 | PAINFUL SWELLING - ELBOW      | 1      | 0   | 99.92 |
| 523 | PAINFUL SWELLING - EPIGASTRIC | 1      | 0   | 99.92 |
| 524 | PAINFUL SWELLING - FACE       | 1      | 0   | 99.92 |
| 525 | PAINFUL SWELLING - FEET       | 1      | 0   | 99.93 |
| 526 | PAINFUL SWELLING - JOINT      | 1      | 0   | 99.93 |
| 527 | PAINFUL SWELLING - MOUTH      | 1      | 0   | 99.93 |
| 528 | PAINFUL SWELLING - NOSE       | 1      | 0   | 99.93 |
| 529 | PAINFUL SWELLING - PALM       | 1      | 0   | 99.94 |
| 530 | PAINFUL SWELLING - RECT       | 1      | 0   | 99.94 |
| 531 | SWELLING - ELBOW              | 1      | 0   | 99.94 |
| 532 | SWELLING - JOINT              | 1      | 0   | 99.94 |
| 533 | SWELLING - MOUTH              | 1      | 0   | 99.95 |
| 534 | SWELLING - OCCIPUT            | 1      | 0   | 99.95 |
| 535 | SWELLING - RIB                | 1      | 0   | 99.95 |
| 536 | SWELLING - URETHRA            | 1      | 0   | 99.95 |
| 537 | TRAUMA - ARM                  | 1      | 0   | 99.96 |
| 538 | TRAUMA - EAR                  | 1      | 0   | 99.96 |
| 539 | TRAUMA - FACIAL               | 1      | 0   | 99.96 |
| 540 | TRAUMA - FOOT                 | 1      | 0   | 99.96 |
| 541 | TRAUMA - LEG                  | 1      | 0   | 99.97 |
| 542 | TRAUMA - PELVIC               | 1      | 0   | 99.97 |
| 543 | TRAUMA - RECT                 | 1      | 0   | 99.97 |
| 544 | TRAUMA - SCALP                | 1      | 0   | 99.97 |
| 545 | TRAUMA - TESTES               | 1      | 0   | 99.98 |
| 546 | WOUND - BODY                  | 1      | 0   | 99.98 |
| 547 | WOUND - EPIGASTRIC            | 1      | 0   | 99.98 |
| 548 | WOUND - INCISION              | 1      | 0   | 99.98 |
| 549 | WOUND - JOINT                 | 1      | 0   | 99.99 |
| 550 | WOUND - OCCIPUT               | 1      | 0   | 99.99 |
| 551 | WOUND - PELVIC                | 1      | 0   | 99.99 |
| 552 | WOUND - SHIN                  | 1      | 0   | 99.99 |
| 553 | WOUND - SHOULDER              | 1      | 0   | 100   |
| 554 | WOUND - STOMACH               | 1      | 0   | 100   |
| 555 | WOUND - TESTES                | 1      | 0   | 100   |
|     | Total                         | 40,389 | 100 |       |
