# Supplementary material for: Derivation and validation of a chief complaint shortlist for unscheduled acute and emergency care in Uganda
Source: PubMed Central journal article supplement — BMJ Open. 2018 Jun 27;8(6):e020188. doi: 10.1136/bmjopen-2017-020188 (PMC6020949; doi:10.1136/bmjopen-2017-020188), 2018-06-27
Supplement: bmjopen-2017-020188supp003.pdf [file bmjopen-2017-020188supp003.pdf]

### Appendix 3: Longlist of Chief Complaints from Validation Dataset

| Num. | Longlist of Chief Complaints | Freq. | Percent | Cum. % |
|------|------------------------------|-------|---------|--------|
| 1    | HEADACHE                     | 1,644 | 8.59    | 8.59   |
| 2    | FEVER                        | 1,458 | 7.62    | 16.21  |
| 3    | ABDOMINAL PAIN               | 1,325 | 6.92    | 23.13  |
| 4    | COUGH                        | 1,169 | 6.11    | 29.24  |
| 5    | VOMITING                     | 1,129 | 5.9     | 35.14  |
| 6    | WEAKNESS - GENERAL           | 685   | 3.58    | 38.72  |
| 7    | CHEST PAIN                   | 647   | 3.38    | 42.1   |
| 8    | DIFFICULTY IN BREATHING      | 587   | 3.07    | 45.17  |
| 9    | LOSS OF APPETITE             | 555   | 2.9     | 48.07  |
| 10   | DIARRHEA                     | 536   | 2.8     | 50.87  |
| 11   | CATHETER CHANGE              | 459   | 2.4     | 53.27  |
| 12   | DIZZINESS                    | 446   | 2.33    | 55.6   |
| 13   | FLU                          | 368   | 1.92    | 57.52  |
| 14   | PAIN - EPIGASTRIC            | 329   | 1.72    | 59.24  |
| 15   | UNRESPONSIVE                 | 279   | 1.46    | 60.7   |
| 16   | BACK ACHE                    | 261   | 1.36    | 62.06  |
| 17   | PAIN - LEG                   | 261   | 1.36    | 63.42  |
| 18   | ROAD TRAFFIC ACCIDENT        | 244   | 1.27    | 64.7   |
| 19   | PAIN                         | 230   | 1.2     | 65.9   |
| 20   | UNABLE TO TALK               | 174   | 0.91    | 66.81  |
| 21   | PAIN - JOINT                 | 160   | 0.84    | 67.65  |
| 22   | PAIN - ARM                   | 152   | 0.79    | 68.44  |
| 23   | DYSURIA                      | 148   | 0.77    | 69.21  |
| 24   | ASSAULT                      | 137   | 0.72    | 69.93  |
| 25   | FAILURE TO PASS STOOL        | 126   | 0.66    | 70.59  |
| 26   | INGESTION - FB               | 125   | 0.65    | 71.24  |
| 27   | PAIN - BACK                  | 117   | 0.61    | 71.85  |
| 28   | HEARING LOSS                 | 112   | 0.59    | 72.44  |
| 29   | WOUND                        | 109   | 0.57    | 73.01  |
| 30   | BURN                         | 98    | 0.51    | 73.52  |
| 31   | CONFUSION                    | 91    | 0.48    | 73.99  |
| 32   | PAIN - NECK                  | 84    | 0.44    | 74.43  |
| 33   | ABDOMINAL DISTENSION         | 81    | 0.42    | 74.86  |
| 34   | BLEEDING                     | 79    | 0.41    | 75.27  |
| 35   | CHILLS                       | 79    | 0.41    | 75.68  |
| 36   | SWELLING                     | 78    | 0.41    | 76.09  |
| 37   | PAIN - EAR                   | 77    | 0.4     | 76.49  |
| 38   | PAIN - LOWER EXTREMITY       | 74    | 0.39    | 76.88  |
| 39   | NAUSEA                       | 72    | 0.38    | 77.25  |
| 40   | SEIZURE                      | 67    | 0.35    | 77.6   |
| 41   | WOUND - FACE                 | 65    | 0.34    | 77.94  |
| 42   | PRURITUS                     | 61    | 0.32    | 78.26  |
| 43   | UNABLE TO PASS URINE         | 61    | 0.32    | 78.58  |
| 44   | FOREIGN BODY - EAR           | 59    | 0.31    | 78.89  |
| 45   | PAIN - KNEE                  | 59    | 0.31    | 79.2   |
| 46   | WOUND - HEAD                 | 58    | 0.3     | 79.5   |
| 47   | BLEEDING - HEAD              | 56    | 0.29    | 79.79  |
| 48   | BLEEDING - NOSE              | 56    | 0.29    | 80.09  |
| 49   | POISONING                    | 56    | 0.29    | 80.38  |
| 50   | FOREIGN BODY - NOSE          | 55    | 0.29    | 80.67  |
| 51   | URINARY PROBLEM              | 55    | 0.29    | 80.95  |
| 52   | WOUND - LEG                  | 55    | 0.29    | 81.24  |
| 53   | PAIN - EYE                   | 54    | 0.28    | 81.52  |
| 54   | PAIN - HEAD                  | 54    | 0.28    | 81.81  |
| 55   | FEEDING PROBLEM              | 52    | 0.27    | 82.08  |
| 56   | PAIN - SHOULDER              | 52    | 0.27    | 82.35  |
| 57   | LOSS OF CONSCIOUSNESS        | 51    | 0.27    | 82.62  |
| 58   | HEMATEMESIS                  | 49    | 0.26    | 82.87  |
| 59   | PAIN - FOOT                  | 48    | 0.25    | 83.12  |

|     |                            |    |      |       |
|-----|----------------------------|----|------|-------|
| 60  | RASH                       | 47 | 0.25 | 83.37 |
| 61  | NIGHT SWEATS               | 46 | 0.24 | 83.61 |
| 62  | CONSTIPATION               | 45 | 0.24 | 83.84 |
| 63  | ANOREXIA                   | 44 | 0.23 | 84.07 |
| 64  | POISONING - COWTICK        | 44 | 0.23 | 84.3  |
| 65  | BRUISING                   | 43 | 0.22 | 84.53 |
| 66  | WOUND - SCALP              | 42 | 0.22 | 84.75 |
| 67  | ALTERED MENTAL STATUS      | 41 | 0.21 | 84.96 |
| 68  | BITE - DOG                 | 37 | 0.19 | 85.16 |
| 69  | BLEEDING - SCALP           | 37 | 0.19 | 85.35 |
| 70  | PAIN - BODY                | 37 | 0.19 | 85.54 |
| 71  | CUT                        | 36 | 0.19 | 85.73 |
| 72  | PAIN - THIGH               | 36 | 0.19 | 85.92 |
| 73  | PAIN - FINGER              | 35 | 0.18 | 86.1  |
| 74  | BLEEDING - VAGINA          | 34 | 0.18 | 86.28 |
| 75  | UNCONSCIOUS                | 34 | 0.18 | 86.46 |
| 76  | INJURY                     | 33 | 0.17 | 86.63 |
| 77  | PAIN - LIMB                | 33 | 0.17 | 86.8  |
| 78  | WEIGHT LOSS                | 33 | 0.17 | 86.97 |
| 79  | NUMBNESS/TINGLING          | 32 | 0.17 | 87.14 |
| 80  | SORE THROAT                | 31 | 0.16 | 87.3  |
| 81  | HEMATURIA                  | 30 | 0.16 | 87.46 |
| 82  | BLEEDING - FACE            | 29 | 0.15 | 87.61 |
| 83  | DIAPHORESIS                | 29 | 0.15 | 87.76 |
| 84  | STOMACH ACHE               | 29 | 0.15 | 87.91 |
| 85  | BLEEDING - EAR             | 28 | 0.15 | 88.06 |
| 86  | SWELLING - LEG             | 28 | 0.15 | 88.21 |
| 87  | WOUND - FACIAL             | 28 | 0.15 | 88.35 |
| 88  | FAILURE TO EAT             | 27 | 0.14 | 88.49 |
| 89  | PAIN - HAND                | 27 | 0.14 | 88.64 |
| 90  | WOUND - ARM                | 27 | 0.14 | 88.78 |
| 91  | WOUND - KNEE               | 26 | 0.14 | 88.91 |
| 92  | FALL                       | 25 | 0.13 | 89.04 |
| 93  | INTOXICATION - ALCOHOL     | 25 | 0.13 | 89.17 |
| 94  | SWELLING - BODY            | 25 | 0.13 | 89.3  |
| 95  | ABDOMINAL DISCOMFORT       | 23 | 0.12 | 89.42 |
| 96  | ABRASION                   | 23 | 0.12 | 89.54 |
| 97  | BREATHING PROBLEM          | 23 | 0.12 | 89.66 |
| 98  | URINARY FREQUENCY          | 23 | 0.12 | 89.78 |
| 99  | HEMOPTYSIS                 | 22 | 0.11 | 89.9  |
| 100 | BLEEDING - MOUTH           | 21 | 0.11 | 90.01 |
| 101 | CATHETER PROBLEM           | 21 | 0.11 | 90.12 |
| 102 | FOREIGN BODY - THROAT      | 21 | 0.11 | 90.23 |
| 103 | WOUND - EYE                | 20 | 0.1  | 90.33 |
| 104 | WOUND - FOOT               | 20 | 0.1  | 90.44 |
| 105 | ABDOMINAL FULLNESS         | 19 | 0.1  | 90.54 |
| 106 | EAR WAX                    | 19 | 0.1  | 90.64 |
| 107 | PAIN - HIP                 | 19 | 0.1  | 90.74 |
| 108 | PAIN - LIP                 | 19 | 0.1  | 90.83 |
| 109 | RESTLESSNESS               | 19 | 0.1  | 90.93 |
| 110 | SWELLING - LOWER EXTREMITY | 19 | 0.1  | 91.03 |
| 111 | WOUND - LIP                | 19 | 0.1  | 91.13 |
| 112 | DENTAL PROBLEM             | 18 | 0.09 | 91.23 |
| 113 | HEAD INJURY                | 18 | 0.09 | 91.32 |
| 114 | PAIN - FACE                | 18 | 0.09 | 91.41 |
| 115 | SHORTNESS OF BREATH        | 18 | 0.09 | 91.51 |
| 116 | SWELLING - FACE            | 18 | 0.09 | 91.6  |
| 117 | SWELLING - PENILE          | 18 | 0.09 | 91.7  |
| 118 | DIARRHEA - BLOODY          | 17 | 0.09 | 91.79 |
| 119 | FAINTING                   | 17 | 0.09 | 91.87 |
| 120 | MALAISE                    | 17 | 0.09 | 91.96 |
| 121 | PAINFUL SWELLING - LEG     | 17 | 0.09 | 92.05 |
| 122 | RUNNY NOSE                 | 17 | 0.09 | 92.14 |

|     |                         |    |      |       |
|-----|-------------------------|----|------|-------|
| 123 | BLEEDING - LEG          | 16 | 0.08 | 92.22 |
| 124 | CHEST TIGHTNESS         | 16 | 0.08 | 92.31 |
| 125 | INGUINAL PAIN           | 16 | 0.08 | 92.39 |
| 126 | LACERATION              | 16 | 0.08 | 92.48 |
| 127 | PAIN - SCALP            | 16 | 0.08 | 92.56 |
| 128 | PAIN - TOE              | 16 | 0.08 | 92.64 |
| 129 | SHIVERING               | 16 | 0.08 | 92.73 |
| 130 | WOUND - FOREHEAD        | 16 | 0.08 | 92.81 |
| 131 | ABNORMAL CRYING         | 15 | 0.08 | 92.89 |
| 132 | EPISTAXIS               | 15 | 0.08 | 92.97 |
| 133 | PAIN - RIB              | 15 | 0.08 | 93.05 |
| 134 | POISONING - RAT         | 15 | 0.08 | 93.12 |
| 135 | UNABLE TO WALK          | 15 | 0.08 | 93.2  |
| 136 | INCONTINENCE - URINARY  | 14 | 0.07 | 93.28 |
| 137 | SEMICONSCIOUS           | 14 | 0.07 | 93.35 |
| 138 | SWELLING - EYE          | 14 | 0.07 | 93.42 |
| 139 | SWELLING - HEAD         | 14 | 0.07 | 93.49 |
| 140 | WOUND - HAND            | 14 | 0.07 | 93.57 |
| 141 | DIFFICULT URINATION     | 13 | 0.07 | 93.64 |
| 142 | FRACTURE - LEG          | 13 | 0.07 | 93.7  |
| 143 | PAIN - ELBOW            | 13 | 0.07 | 93.77 |
| 144 | SWELLING - NECK         | 13 | 0.07 | 93.84 |
| 145 | PAIN - FOREHEAD         | 12 | 0.06 | 93.9  |
| 146 | PAIN - UMBILICAL        | 12 | 0.06 | 93.96 |
| 147 | PAINFUL SWELLING - ARM  | 12 | 0.06 | 94.03 |
| 148 | PAINFUL SWELLING - FOOT | 12 | 0.06 | 94.09 |
| 149 | POISONING - SUSPECTED   | 12 | 0.06 | 94.15 |
| 150 | SWELLING - FOOT         | 12 | 0.06 | 94.22 |
| 151 | SWELLING - SCROTAL      | 12 | 0.06 | 94.28 |
| 152 | URINARY RETENTION       | 12 | 0.06 | 94.34 |
| 153 | VAGINA DISCHARGE        | 12 | 0.06 | 94.4  |
| 154 | BLEEDING - EYE          | 11 | 0.06 | 94.46 |
| 155 | BLEEDING - HAND         | 11 | 0.06 | 94.52 |
| 156 | LACERATION - FACE       | 11 | 0.06 | 94.58 |
| 157 | PAIN - BREAST           | 11 | 0.06 | 94.63 |
| 158 | PAIN - PELVIC           | 11 | 0.06 | 94.69 |
| 159 | PARALYSIS               | 11 | 0.06 | 94.75 |
| 160 | PARALYSIS - LEFT SIDED  | 11 | 0.06 | 94.81 |
| 161 | SORES - ORAL            | 11 | 0.06 | 94.86 |
| 162 | SWELLING - ARM          | 11 | 0.06 | 94.92 |
| 163 | TALKATIVE               | 11 | 0.06 | 94.98 |
| 164 | LACERATION - FACIAL     | 10 | 0.05 | 95.03 |
| 165 | PAIN - TESTES           | 10 | 0.05 | 95.08 |
| 166 | SEMIRESPONSIVE          | 10 | 0.05 | 95.14 |
| 167 | SWELLING - FACIAL       | 10 | 0.05 | 95.19 |
| 168 | DYSPHASIA               | 9  | 0.05 | 95.23 |
| 169 | HICCUPS                 | 9  | 0.05 | 95.28 |
| 170 | LACERATION - ARM        | 9  | 0.05 | 95.33 |
| 171 | LACERATION - HEAD       | 9  | 0.05 | 95.38 |
| 172 | PAIN - THUMB            | 9  | 0.05 | 95.42 |
| 173 | SWELLING - LIMB         | 9  | 0.05 | 95.47 |
| 174 | TOOTHACHE               | 9  | 0.05 | 95.52 |
| 175 | WOUND - MOUTH           | 9  | 0.05 | 95.56 |
| 176 | WOUND - THIGH           | 9  | 0.05 | 95.61 |
| 177 | YELLOW EYES             | 9  | 0.05 | 95.66 |
| 178 | BITE                    | 8  | 0.04 | 95.7  |
| 179 | BLEEDING - FINGER       | 8  | 0.04 | 95.74 |
| 180 | DISCHARGE - EAR         | 8  | 0.04 | 95.78 |
| 181 | EAR ACHE                | 8  | 0.04 | 95.83 |
| 182 | LACERATION - SCALP      | 8  | 0.04 | 95.87 |
| 183 | MYALGIA                 | 8  | 0.04 | 95.91 |
| 184 | PAIN - STOMACH          | 8  | 0.04 | 95.95 |
| 185 | PAIN - UPPER EXTREMITY  | 8  | 0.04 | 95.99 |

|     |                             |   |      |       |
|-----|-----------------------------|---|------|-------|
| 186 | PAINFUL SWELLING - EYE      | 8 | 0.04 | 96.03 |
| 187 | PARALYSIS - RIGHT SIDED     | 8 | 0.04 | 96.08 |
| 188 | VISION CHANGE               | 8 | 0.04 | 96.12 |
| 189 | WOUND - CHEEK               | 8 | 0.04 | 96.16 |
| 190 | ABDOMINAL PAIN - EPIGASTRIC | 7 | 0.04 | 96.2  |
| 191 | ABDOMINAL PAIN - GENERAL    | 7 | 0.04 | 96.23 |
| 192 | PAINFUL SWELLING - THIGH    | 7 | 0.04 | 96.27 |
| 193 | SORES                       | 7 | 0.04 | 96.31 |
| 194 | SWELLING - CHEEK            | 7 | 0.04 | 96.34 |
| 195 | SWELLING - FEET             | 7 | 0.04 | 96.38 |
| 196 | SWELLING - THIGH            | 7 | 0.04 | 96.42 |
| 197 | WASTING                     | 7 | 0.04 | 96.45 |
| 198 | WOUND - HEEL                | 7 | 0.04 | 96.49 |
| 199 | DIFFICULTY SWALLOWING       | 6 | 0.03 | 96.52 |
| 200 | EAR SYRINGING               | 6 | 0.03 | 96.55 |
| 201 | FRACTURE - ARM              | 6 | 0.03 | 96.58 |
| 202 | FRACTURE - LOWER EXTREMITY  | 6 | 0.03 | 96.61 |
| 203 | LACERATION - ELBOW          | 6 | 0.03 | 96.65 |
| 204 | PAIN - ANKLE                | 6 | 0.03 | 96.68 |
| 205 | PAIN - CHEEK                | 6 | 0.03 | 96.71 |
| 206 | PAIN - JAW                  | 6 | 0.03 | 96.74 |
| 207 | PAIN - MOUTH                | 6 | 0.03 | 96.77 |
| 208 | PAIN - SCROTAL              | 6 | 0.03 | 96.8  |
| 209 | PAIN - WRIST                | 6 | 0.03 | 96.83 |
| 210 | PALPITATIONS                | 6 | 0.03 | 96.86 |
| 211 | SUTURE REMOVAL              | 6 | 0.03 | 96.9  |
| 212 | SWELLING - EAR              | 6 | 0.03 | 96.93 |
| 213 | SWELLING - FOREHEAD         | 6 | 0.03 | 96.96 |
| 214 | SWELLING - SCALP            | 6 | 0.03 | 96.99 |
| 215 | SWELLING - UMBILICAL        | 6 | 0.03 | 97.02 |
| 216 | TONGUE TIE                  | 6 | 0.03 | 97.05 |
| 217 | UNABLE TO STAND             | 6 | 0.03 | 97.08 |
| 218 | WOUND - BUTT                | 6 | 0.03 | 97.12 |
| 219 | WOUND DRESSING              | 6 | 0.03 | 97.15 |
| 220 | ABDOMINAL PAIN - LEFT       | 5 | 0.03 | 97.17 |
| 221 | ABSCESS                     | 5 | 0.03 | 97.2  |
| 222 | BITE - SNAKE                | 5 | 0.03 | 97.23 |
| 223 | BLEEDING - ARM              | 5 | 0.03 | 97.25 |
| 224 | BLEEDING - FOOT             | 5 | 0.03 | 97.28 |
| 225 | BLEEDING - KNEE             | 5 | 0.03 | 97.3  |
| 226 | DROWSINESS                  | 5 | 0.03 | 97.33 |
| 227 | NECK STIFFNESS              | 5 | 0.03 | 97.36 |
| 228 | PAIN - BUTT                 | 5 | 0.03 | 97.38 |
| 229 | PAIN - TOOTH                | 5 | 0.03 | 97.41 |
| 230 | PAINFUL SWELLING - SCROTAL  | 5 | 0.03 | 97.43 |
| 231 | PUNCTURE WOUND              | 5 | 0.03 | 97.46 |
| 232 | RAPE                        | 5 | 0.03 | 97.49 |
| 233 | SWELLING - BACK             | 5 | 0.03 | 97.51 |
| 234 | SWELLING - BREAST           | 5 | 0.03 | 97.54 |
| 235 | SWELLING - FINGER           | 5 | 0.03 | 97.57 |
| 236 | SWELLING - HAND             | 5 | 0.03 | 97.59 |
| 237 | WHEEZING                    | 5 | 0.03 | 97.62 |
| 238 | WOUND - ANKLE               | 5 | 0.03 | 97.64 |
| 239 | WOUND - FINGER              | 5 | 0.03 | 97.67 |
| 240 | WOUND - LOWER EXTREMITY     | 5 | 0.03 | 97.7  |
| 241 | ABNORMAL BLOOD SUGAR        | 4 | 0.02 | 97.72 |
| 242 | BEE STING                   | 4 | 0.02 | 97.74 |
| 243 | BITE - CAT                  | 4 | 0.02 | 97.76 |
| 244 | BLEEDING - FACIAL           | 4 | 0.02 | 97.78 |
| 245 | BLEEDING - TOE              | 4 | 0.02 | 97.8  |
| 246 | CUT - FINGER                | 4 | 0.02 | 97.82 |
| 247 | DIARRHEA - NONBLOODY        | 4 | 0.02 | 97.84 |
| 248 | EDEMA - GENERALIZED         | 4 | 0.02 | 97.86 |

|     |                                    |   |      |       |
|-----|------------------------------------|---|------|-------|
| 249 | EYE DISCHARGE                      | 4 | 0.02 | 97.88 |
| 250 | EYE REDNESS                        | 4 | 0.02 | 97.9  |
| 251 | FATIGUE                            | 4 | 0.02 | 97.93 |
| 252 | FRACTURE                           | 4 | 0.02 | 97.95 |
| 253 | INCONTINENCE                       | 4 | 0.02 | 97.97 |
| 254 | INGESTION - DRUG                   | 4 | 0.02 | 97.99 |
| 255 | JOINT ACHES                        | 4 | 0.02 | 98.01 |
| 256 | LACERATION - EYE                   | 4 | 0.02 | 98.03 |
| 257 | LACERATION - FOOT                  | 4 | 0.02 | 98.05 |
| 258 | LACERATION - HAND                  | 4 | 0.02 | 98.07 |
| 259 | LIGHTENING STRIKE                  | 4 | 0.02 | 98.09 |
| 260 | MALARIA                            | 4 | 0.02 | 98.11 |
| 261 | PAIN - NOSE                        | 4 | 0.02 | 98.13 |
| 262 | PAINFUL SWELLING - FINGER          | 4 | 0.02 | 98.16 |
| 263 | PAINFUL SWELLING - LOWER EXTREMITY | 4 | 0.02 | 98.18 |
| 264 | PAINFUL SWELLING - NECK            | 4 | 0.02 | 98.2  |
| 265 | PAINFUL SWELLING - TOE             | 4 | 0.02 | 98.22 |
| 266 | POISONING - PARAFFIN               | 4 | 0.02 | 98.24 |
| 267 | ROAD TRAFFIC ACCIDENT - PEDESTRIAN | 4 | 0.02 | 98.26 |
| 268 | SWELLING - BUTT                    | 4 | 0.02 | 98.28 |
| 269 | SWELLING - GENITAL                 | 4 | 0.02 | 98.3  |
| 270 | TRAUMA - EYE                       | 4 | 0.02 | 98.32 |
| 271 | ULCER                              | 4 | 0.02 | 98.34 |
| 272 | WOUND - BODY                       | 4 | 0.02 | 98.36 |
| 273 | WOUND - LIMB                       | 4 | 0.02 | 98.39 |
| 274 | WOUND - NOSE                       | 4 | 0.02 | 98.41 |
| 275 | WOUND - SHOULDER                   | 4 | 0.02 | 98.43 |
| 276 | ABDOMINAL CRAMPS                   | 3 | 0.02 | 98.44 |
| 277 | ABDOMINAL PAIN - RIGHT             | 3 | 0.02 | 98.46 |
| 278 | ABDOMINAL PAIN - RIGHT LOWER       | 3 | 0.02 | 98.47 |
| 279 | ABDOMINAL SWELLING                 | 3 | 0.02 | 98.49 |
| 280 | ANIMAL ATTACK - COW                | 3 | 0.02 | 98.51 |
| 281 | BLEEDING - FOREHEAD                | 3 | 0.02 | 98.52 |
| 282 | BLEEDING - THUMB                   | 3 | 0.02 | 98.54 |
| 283 | CHANGE IN SENSATION                | 3 | 0.02 | 98.55 |
| 284 | CUT - EYE                          | 3 | 0.02 | 98.57 |
| 285 | EDEMA - LOWER EXT                  | 3 | 0.02 | 98.58 |
| 286 | FAST BREATHING                     | 3 | 0.02 | 98.6  |
| 287 | HIT                                | 3 | 0.02 | 98.62 |
| 288 | LACERATION - KNEE                  | 3 | 0.02 | 98.63 |
| 289 | LACERATION - LIP                   | 3 | 0.02 | 98.65 |
| 290 | NASAL CONGESTION                   | 3 | 0.02 | 98.66 |
| 291 | OVERDOSE                           | 3 | 0.02 | 98.68 |
| 292 | PAIN - FACIAL                      | 3 | 0.02 | 98.69 |
| 293 | PAIN - GENITAL                     | 3 | 0.02 | 98.71 |
| 294 | PAIN - INCISION                    | 3 | 0.02 | 98.73 |
| 295 | PAIN - PALM                        | 3 | 0.02 | 98.74 |
| 296 | PAIN - PELVIS                      | 3 | 0.02 | 98.76 |
| 297 | PAIN - PENILE                      | 3 | 0.02 | 98.77 |
| 298 | PAINFUL SWELLING - BREAST          | 3 | 0.02 | 98.79 |
| 299 | PAINFUL SWELLING - GENITAL         | 3 | 0.02 | 98.8  |
| 300 | PAINFUL SWELLING - HAND            | 3 | 0.02 | 98.82 |
| 301 | PAINFUL SWELLING - KNEE            | 3 | 0.02 | 98.83 |
| 302 | PENILE DISCHARGE                   | 3 | 0.02 | 98.85 |
| 303 | SWELLING - ANKLE                   | 3 | 0.02 | 98.87 |
| 304 | SWELLING - TESTES                  | 3 | 0.02 | 98.88 |
| 305 | TRAUMA - HEAD                      | 3 | 0.02 | 98.9  |
| 306 | WEAKNESS - LEFT SIDED              | 3 | 0.02 | 98.91 |
| 307 | WOUND - BACK                       | 3 | 0.02 | 98.93 |
| 308 | WOUND - EAR                        | 3 | 0.02 | 98.94 |
| 309 | WOUND - NECK                       | 3 | 0.02 | 98.96 |
| 310 | WOUND - PALM                       | 3 | 0.02 | 98.98 |
| 311 | WOUND CHECK                        | 3 | 0.02 | 98.99 |

|     |                              |   |      |       |
|-----|------------------------------|---|------|-------|
| 312 | ABDOMINAL PAIN - RIGHT UPPER | 2 | 0.01 | 99    |
| 313 | ABDOMINAL PAIN - UMBILICAL   | 2 | 0.01 | 99.01 |
| 314 | ABSCESS - BUTT               | 2 | 0.01 | 99.02 |
| 315 | ABSCESS - LEG                | 2 | 0.01 | 99.03 |
| 316 | BLEEDING - BACK              | 2 | 0.01 | 99.04 |
| 317 | BLEEDING - EYELID            | 2 | 0.01 | 99.05 |
| 318 | BLEEDING - LIP               | 2 | 0.01 | 99.06 |
| 319 | BLEEDING - OCCIPUT           | 2 | 0.01 | 99.08 |
| 320 | BLEEDING - PELVIC            | 2 | 0.01 | 99.09 |
| 321 | BLEEDING - PENILE            | 2 | 0.01 | 99.1  |
| 322 | BLEEDING - URETHRA           | 2 | 0.01 | 99.11 |
| 323 | CUT - ARM                    | 2 | 0.01 | 99.12 |
| 324 | CUT - FOOT                   | 2 | 0.01 | 99.13 |
| 325 | CUT - HAND                   | 2 | 0.01 | 99.14 |
| 326 | CUT - HEAD                   | 2 | 0.01 | 99.15 |
| 327 | CUT - THUMB                  | 2 | 0.01 | 99.16 |
| 328 | DRESSING CHANGE              | 2 | 0.01 | 99.17 |
| 329 | LACERATION - FOREHEAD        | 2 | 0.01 | 99.18 |
| 330 | PAIN - ANAL                  | 2 | 0.01 | 99.19 |
| 331 | PAIN - CHIN                  | 2 | 0.01 | 99.2  |
| 332 | PAIN - FEET                  | 2 | 0.01 | 99.21 |
| 333 | PAIN - HEEL                  | 2 | 0.01 | 99.22 |
| 334 | PAIN - RECT                  | 2 | 0.01 | 99.23 |
| 335 | PAINFUL SWELLING - ANKLE     | 2 | 0.01 | 99.24 |
| 336 | PAINFUL SWELLING - BUTT      | 2 | 0.01 | 99.25 |
| 337 | PAINFUL SWELLING - CHEEK     | 2 | 0.01 | 99.26 |
| 338 | PAINFUL SWELLING - EAR       | 2 | 0.01 | 99.27 |
| 339 | PAINFUL SWELLING - FACE      | 2 | 0.01 | 99.28 |
| 340 | PAINFUL SWELLING - FOREHEAD  | 2 | 0.01 | 99.29 |
| 341 | PAINFUL SWELLING - HEAD      | 2 | 0.01 | 99.31 |
| 342 | PAINFUL SWELLING - JOINT     | 2 | 0.01 | 99.32 |
| 343 | PAINFUL SWELLING - UMBILICAL | 2 | 0.01 | 99.33 |
| 344 | POISONING - PESTICIDE        | 2 | 0.01 | 99.34 |
| 345 | RIGORS                       | 2 | 0.01 | 99.35 |
| 346 | SWELLING - AXILLA            | 2 | 0.01 | 99.36 |
| 347 | SWELLING - HIP               | 2 | 0.01 | 99.37 |
| 348 | SWELLING - JOINT             | 2 | 0.01 | 99.38 |
| 349 | SWELLING - KNEE              | 2 | 0.01 | 99.39 |
| 350 | SWELLING - LIP               | 2 | 0.01 | 99.4  |
| 351 | SWELLING - THUMB             | 2 | 0.01 | 99.41 |
| 352 | SWELLING - UPPER EXTREMITY   | 2 | 0.01 | 99.42 |
| 353 | THRUSH - ORAL                | 2 | 0.01 | 99.43 |
| 354 | VAGINA COMPLAINT             | 2 | 0.01 | 99.44 |
| 355 | WEAKNESS - UNILATERAL        | 2 | 0.01 | 99.45 |
| 356 | WOUND - CHIN                 | 2 | 0.01 | 99.46 |
| 357 | WOUND - ELBOW                | 2 | 0.01 | 99.47 |
| 358 | WOUND - EYELID               | 2 | 0.01 | 99.48 |
| 359 | WOUND - FEET                 | 2 | 0.01 | 99.49 |
| 360 | WOUND - GENITAL              | 2 | 0.01 | 99.5  |
| 361 | WOUND - OCCIPUT              | 2 | 0.01 | 99.51 |
| 362 | WOUND - SCROTAL              | 2 | 0.01 | 99.52 |
| 363 | WOUND - THUMB                | 2 | 0.01 | 99.53 |
| 364 | WOUND - TOE                  | 2 | 0.01 | 99.55 |
| 365 | ABDOMINAL PAIN - COLICKY     | 1 | 0.01 | 99.55 |
| 366 | ABDOMINAL PAIN - LEFT UPPER  | 1 | 0.01 | 99.56 |
| 367 | ABSCESS - AXILLA             | 1 | 0.01 | 99.56 |
| 368 | ABSCESS - EAR                | 1 | 0.01 | 99.57 |
| 369 | ABSCESS - FOOT               | 1 | 0.01 | 99.57 |
| 370 | ABSCESS - JAW                | 1 | 0.01 | 99.58 |
| 371 | ABSCESS - RECT               | 1 | 0.01 | 99.58 |
| 372 | ABSCESS - THIGH              | 1 | 0.01 | 99.59 |
| 373 | AGITATION                    | 1 | 0.01 | 99.59 |
| 374 | ALLERGIC REACTION            | 1 | 0.01 | 99.6  |

|     |                                         |   |      |       |
|-----|-----------------------------------------|---|------|-------|
| 375 | ASTHMA                                  | 1 | 0.01 | 99.6  |
| 376 | BLEEDING - ANAL                         | 1 | 0.01 | 99.61 |
| 377 | BLEEDING - BODY                         | 1 | 0.01 | 99.61 |
| 378 | BLEEDING - BUTT                         | 1 | 0.01 | 99.62 |
| 379 | BLEEDING - CHEEK                        | 1 | 0.01 | 99.62 |
| 380 | BLEEDING - CHIN                         | 1 | 0.01 | 99.63 |
| 381 | BLEEDING - ELBOW                        | 1 | 0.01 | 99.63 |
| 382 | BLEEDING - GENITAL                      | 1 | 0.01 | 99.64 |
| 383 | BLEEDING - LOWER EXTREMITY              | 1 | 0.01 | 99.64 |
| 384 | BLEEDING - NECK                         | 1 | 0.01 | 99.65 |
| 385 | BLEEDING - RECT                         | 1 | 0.01 | 99.66 |
| 386 | BLEEDING - SCROTAL                      | 1 | 0.01 | 99.66 |
| 387 | BLEEDING - WRIST                        | 1 | 0.01 | 99.67 |
| 388 | BLUNT TRAUMA                            | 1 | 0.01 | 99.67 |
| 389 | CUT - CHEEK                             | 1 | 0.01 | 99.68 |
| 390 | CUT - EAR                               | 1 | 0.01 | 99.68 |
| 391 | CUT - MOUTH                             | 1 | 0.01 | 99.69 |
| 392 | CUT - NOSE                              | 1 | 0.01 | 99.69 |
| 393 | CUT - OCCIPUT                           | 1 | 0.01 | 99.7  |
| 394 | CUT - THIGH                             | 1 | 0.01 | 99.7  |
| 395 | CUT - TOE                               | 1 | 0.01 | 99.71 |
| 396 | DEAD ON ARRIVAL                         | 1 | 0.01 | 99.71 |
| 397 | DECREASED RESPONSIVENESS                | 1 | 0.01 | 99.72 |
| 398 | DIAGNOSTIC/THERAPEUTIC PROCEDURE NEEDED | 1 | 0.01 | 99.72 |
| 399 | DIFFICULT MICTURITION                   | 1 | 0.01 | 99.73 |
| 400 | EDEMA - FACIAL                          | 1 | 0.01 | 99.73 |
| 401 | FAILURE TO THRIVE                       | 1 | 0.01 | 99.74 |
| 402 | FORESKIN RETRACTION                     | 1 | 0.01 | 99.74 |
| 403 | FRACTURE - ELBOW                        | 1 | 0.01 | 99.75 |
| 404 | FRACTURE - JAW                          | 1 | 0.01 | 99.75 |
| 405 | FRACTURE - JOINT                        | 1 | 0.01 | 99.76 |
| 406 | FRACTURE - LIMB                         | 1 | 0.01 | 99.76 |
| 407 | FRACTURE - NECK                         | 1 | 0.01 | 99.77 |
| 408 | FRACTURE - SHOULDER                     | 1 | 0.01 | 99.78 |
| 409 | FRACTURE - THIGH                        | 1 | 0.01 | 99.78 |
| 410 | FRACTURE - UPPER EXTREMITY              | 1 | 0.01 | 99.79 |
| 411 | IV PLACEMENT                            | 1 | 0.01 | 99.79 |
| 412 | LACERATION - ANKLE                      | 1 | 0.01 | 99.8  |
| 413 | LACERATION - FINGER                     | 1 | 0.01 | 99.8  |
| 414 | LACERATION - HEEL                       | 1 | 0.01 | 99.81 |
| 415 | LACERATION - JAW                        | 1 | 0.01 | 99.81 |
| 416 | LACERATION - LIMB                       | 1 | 0.01 | 99.82 |
| 417 | LACERATION - SHOULDER                   | 1 | 0.01 | 99.82 |
| 418 | LACERATION - WRIST                      | 1 | 0.01 | 99.83 |
| 419 | PAIN - EYELID                           | 1 | 0.01 | 99.83 |
| 420 | PAIN - TONGUE                           | 1 | 0.01 | 99.84 |
| 421 | PAIN - URETHRA                          | 1 | 0.01 | 99.84 |
| 422 | PAIN - VAGINA                           | 1 | 0.01 | 99.85 |
| 423 | PAINFUL SWELLING - ANAL                 | 1 | 0.01 | 99.85 |
| 424 | PAINFUL SWELLING - AXILLA               | 1 | 0.01 | 99.86 |
| 425 | PAINFUL SWELLING - BODY                 | 1 | 0.01 | 99.86 |
| 426 | PAINFUL SWELLING - ELBOW                | 1 | 0.01 | 99.87 |
| 427 | PAINFUL SWELLING - FACIAL               | 1 | 0.01 | 99.87 |
| 428 | PAINFUL SWELLING - JAW                  | 1 | 0.01 | 99.88 |
| 429 | PAINFUL SWELLING - LIMB                 | 1 | 0.01 | 99.89 |
| 430 | PAINFUL SWELLING - LIP                  | 1 | 0.01 | 99.89 |
| 431 | PAINFUL SWELLING - PENILE               | 1 | 0.01 | 99.9  |
| 432 | PAINFUL SWELLING - SCALP                | 1 | 0.01 | 99.9  |
| 433 | PAINFUL SWELLING - THUMB                | 1 | 0.01 | 99.91 |
| 434 | PHIMOSIS                                | 1 | 0.01 | 99.91 |
| 435 | SUICIDE ATTEMPT                         | 1 | 0.01 | 99.92 |
| 436 | SWELLING - ELBOW                        | 1 | 0.01 | 99.92 |
| 437 | SWELLING - JAW                          | 1 | 0.01 | 99.93 |

|     |                        |        |      |       |
|-----|------------------------|--------|------|-------|
| 438 | SWELLING - MOUTH       | 1      | 0.01 | 99.93 |
| 439 | SWELLING - PALM        | 1      | 0.01 | 99.94 |
| 440 | SWELLING - STOMACH     | 1      | 0.01 | 99.94 |
| 441 | SWELLING - TONGUE      | 1      | 0.01 | 99.95 |
| 442 | SWELLING - VAGINA      | 1      | 0.01 | 99.95 |
| 443 | TRAUMA - EAR           | 1      | 0.01 | 99.96 |
| 444 | TRAUMA - SCROTAL       | 1      | 0.01 | 99.96 |
| 445 | TREMOR                 | 1      | 0.01 | 99.97 |
| 446 | WEAKNESS - RIGHT SIDED | 1      | 0.01 | 99.97 |
| 447 | WOUND - BREAST         | 1      | 0.01 | 99.98 |
| 448 | WOUND - JOINT          | 1      | 0.01 | 99.98 |
| 449 | WOUND - PENILE         | 1      | 0.01 | 99.99 |
| 450 | WOUND - VAGINA         | 1      | 0.01 | 99.99 |
| 451 | WOUND - WRIST          | 1      | 0.01 | 100   |
|     | Total                  | 19,138 | 100  |       |
